# Supplementary material for: A highly selective iron oxide-based imaging nanoparticle for long-term monitoring of drug-induced tumor cell apoptosis
Source: Royal Society of Chemistry journal article supplement (doi:10.1039/d0bm00518e), 2020-06-27
Supplement: d0bm00518e1.pdf [file d0bm00518e1.pdf]

## Supplementary Information

### **A highly selective iron oxide-based imaging nanoparticle for long-term monitoring of drug-induced tumor cell apoptosis**

*Guanyou Lin, Qingxin Mu, Richard Revia, Zachary Stephen, Mike Jeon, Miqin Zhang*

#### **Supplementary text**

##### ***Calculation of number of PSA per IONP-Neu-PSA particle:***

MW of 10 nm IONP: 1,175,018.742 g/mol = 1,175,018,742 mg/mol

MW of Biotin-PSA: 53,000 g/mol = 53,000,000 mg/mol

1.5 mg of IONP after purification = 1.5 mg / 1,175,018,742 mg/mol =  $1.277 \times 10^{-9}$  mol

1 mg of PSA = 1 mg / 53,000,000 mg/mol =  $1.887 \times 10^{-8}$  mol

27.9% (BCA) of PSA bound by IONP-Neu =  $27.9\% \times 1.887 \times 10^{-8}$  mol =  $5.265 \times 10^{-9}$  mol

Number of PSA per IONP-Neu-PSA =  $5.265 \times 10^{-9}$  mol /  $1.277 \times 10^{-9}$  mol = 4.12

20.1 % (SDS-PAGE) of PSA bound by IONP-Neu =  $20.1\% \times 1.887 \times 10^{-8}$  mol =  $3.793 \times 10^{-9}$  mol

Number of PSA per IONP-Neu-PSA =  $3.793 \times 10^{-9}$  mol /  $1.277 \times 10^{-9}$  mol = 2.97

##### ***Calculation of PSA concentration in mouse blood for in vivo toxicity evaluation***

High concentration of PSA can agglutinate erythrocytes and cause hematological toxicity. To ensure minimum in vivo toxicity of IONP-Neu-PSA-Cy5.5, the following calculation of PSA concentration in mice blood was performed. For each mouse, we injected 100  $\mu$ L of 2.8 [Fe] mg/mL IONP-Neu-PSA-Cy5.5. Since each nanoparticle has 3-4 PSA molecules, the maximum 4 PSA/nanoparticle is equivalent to  $\sim 0.95$  nmol of PSA per mouse. Given a 25 g mouse with a typical 2.0 mL total blood volume, the PSA blood concentration in a mouse is  $\sim 0.475$   $\mu$ M. In comparison, the lowest concentration for WGA (36 kDa) to start agglutinate erythrocytes at 37 Celsius is 0.889  $\mu$ M (32  $\mu$ g/mL).<sup>1</sup> Systemic toxicity should be at minimum level at such a low PSA dosage.

## Supplementary Figures

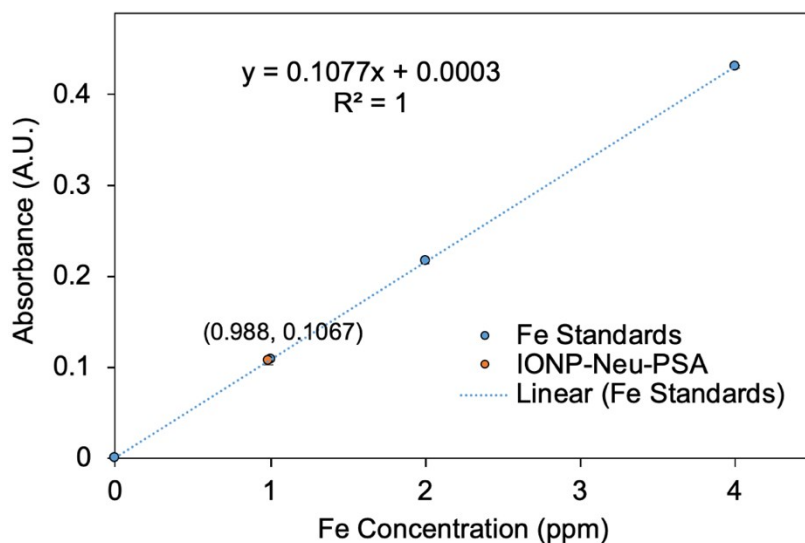

**Figure S1.** Ferrozine assay for quantifying [Fe] concentration of IONP-Neu-PSA. 0 ppm, 1 ppm, 2 ppm, 4 ppm Fe standards were used to construct the linear standard curve as shown. Absorbance of the 500 $\times$  diluted IONP-Neu-PSA sample was 0.1067 which corresponds to 0.988 ppm. The Fe concentration of the undiluted IONP-Neu-PSA is 0.494 mg/mL.

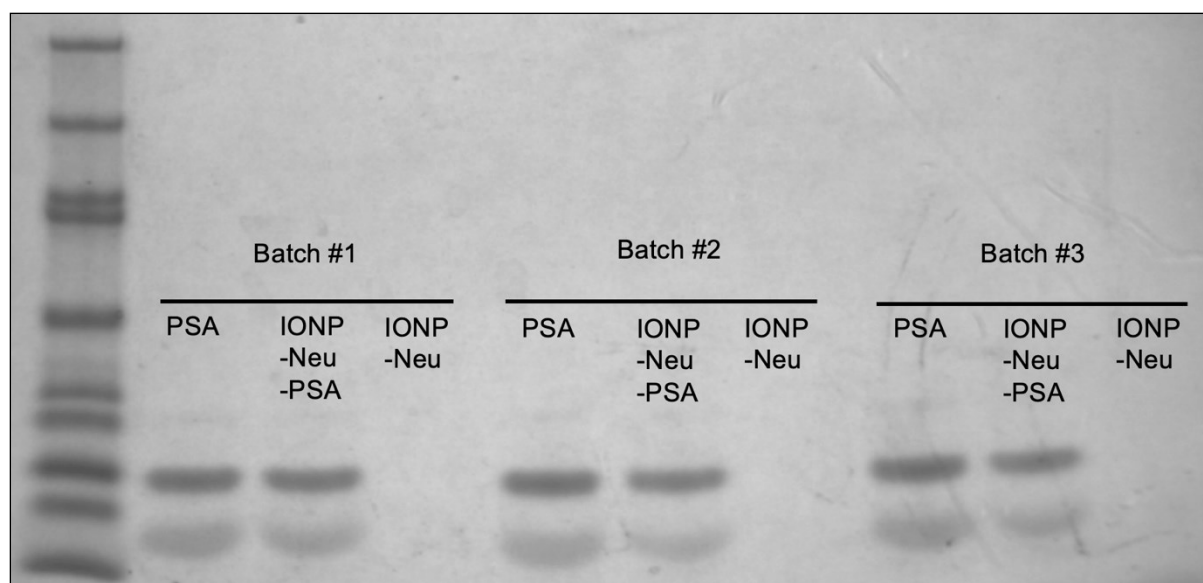

**Figure S2.** Full SDS-PAGE image for quantification of PSA bound on NPs. Three batches of IONP-Neu NPs were synthesized followed by PSA-biotin attachment independently. PSA controls were diluted to the same concentration as the unpurified IONP-Neu-PSA solution.

before spin filtering. The gel was run for 90 mins under a constant voltage of 100 V. The image was taken in a Gel Doc XR imaging system (Bio-Rad).

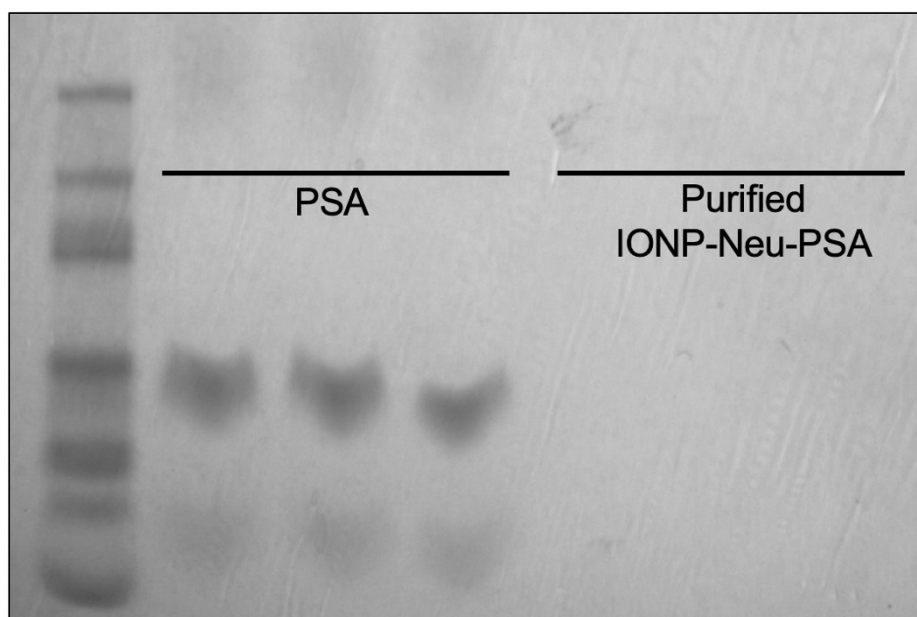

**Figure S3.** Image of the non-reducing SDS-PAGE for examining the purity of IONP-Neu-PSA. PSA controls were diluted to the same concentration as the purified IONP-Neu-PSA solution. Protein samples were not reduced by 2-mercaptoethanol under heating. The gel was run for 90 mins under a constant voltage of 100 V. The image was taken in a Gel Doc XR imaging system (Bio-Rad).

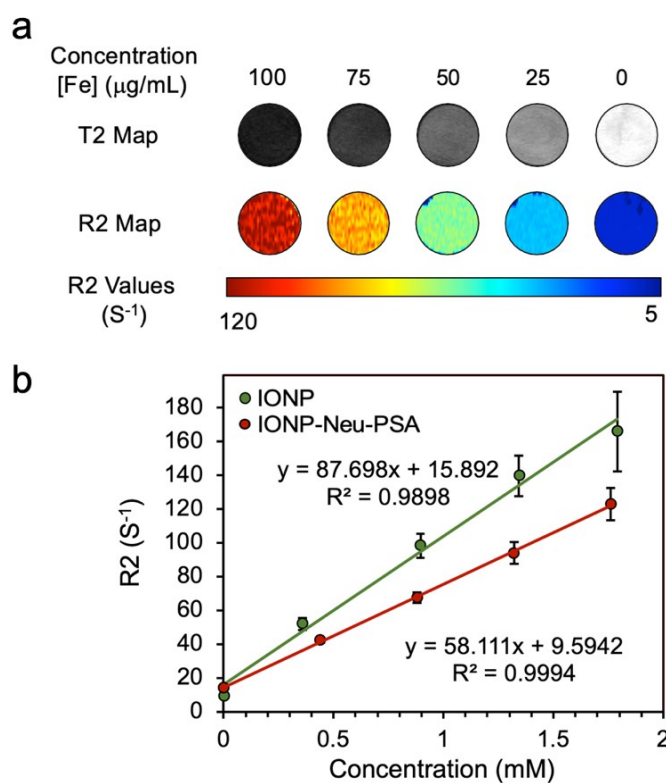

**Figure S4.** MRI characterization of IONP-Neu-PSA. (a) T2 and R2 maps of IONP-Neu-PSA at various particle concentrations. Water is used as the background. (b) Comparison of transverse relaxivity (slope  $S^{-1} \text{ mM}^{-1}$ ) plots between IONP-Neu-PSA and IONP.

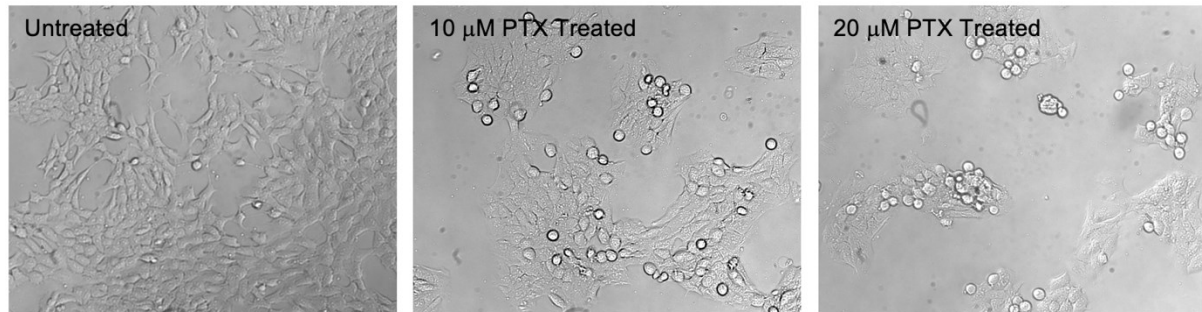

**Figure S5.** Bright field images of untreated, 10  $\mu\text{M}$  PTX and 20  $\mu\text{M}$  PTX treated 4T1 breast cancer cells at lower magnification.

## Reference

- 1 H. P. Schnebli and T. Bächli, *Experimental Cell Research*, 1975, **91**, 175–183.
